# Supplementary material
Source: PubMed Central journal article supplement (PMC7200273)
Supplement: NIHMS1581038-supplement-Supplemental_Publication_Material.pdf [file NIHMS1581038-supplement-Supplemental_Publication_Material.pdf]

## SUPPLEMENTAL MATERIAL

### Validation of modified aptamer-based measurements of APOM

Systematic Evolution of Ligands by Exponential Enrichment (SELEX) technology was used to discover the SOMAmer that can specifically bind APOM. The Dissociation Constant (K<sub>d</sub>) value between SOMAmer (seq ID 10445-20) and its target protein, APOM, is  $2.19 \times 10^{-9}$  M. It was also confirmed that this SOMAmer could successfully pull down the recombinant APOM protein from buffer. Gel analysis of the buffer pulldown revealed 2 bands. The most intense band was the desired protein.

Emilsson V, et al.<sup>29</sup> applied the SomaScan® Assay by testing the serum samples from 5,457 Icelanders. The specificity validation of the SOMAmer reagent to the APOM protein was directly conducted using data dependent analysis (DDA) mass spectrometry. We have downloaded the peptides measured for the APOM SomaMER from the ProteomeXchange Consortium (<http://proteomecentral.proteomexchange.org>) with the data identifier PXD008822:

EFPEVHLGQWYFI AGAAPTK  
EEL ATFDPVDNIV FNMAAGSAPM QLHLR  
M KDGLCVPR  
KW IYHLTEGSTD LR  
TEGRPDMK  
TELFSSSCP GIMLNETGQG YQR  
FLLYNR  
S PHPPEK  
CVEEFK  
SLTSCLDSK  
AFLTPR  
NQEACELSNN

These peptides provide 78.2% coverage of human APOM. Blast search of these peptide sequences identifies one human protein, with an e-value of  $2e-108$ . Based on these search output results, APOM is a very high confidence protein.

Furthermore, cis-acting protein SNPs were identified. Amongst them, SNP, rs115878542, was confirmed to correlate with APOM. In addition to this previous validation, we performed an analysis of the correlation between APOM measured by the SomaScan and APOM measured by ELISA in a subset of the PHFS (n=299). We found a linear relationship with a Pearson correlation coefficient of 0.73 ( $P < 0.0001$ ).

Online Figure 1. APOM, but not HDL-cholesterol, is associated with HF outcomes. Results of unadjusted analyses in non-adjusted analyses (A) and analyses in which APOM and HDL-C are adjusted for each other (B).

A.

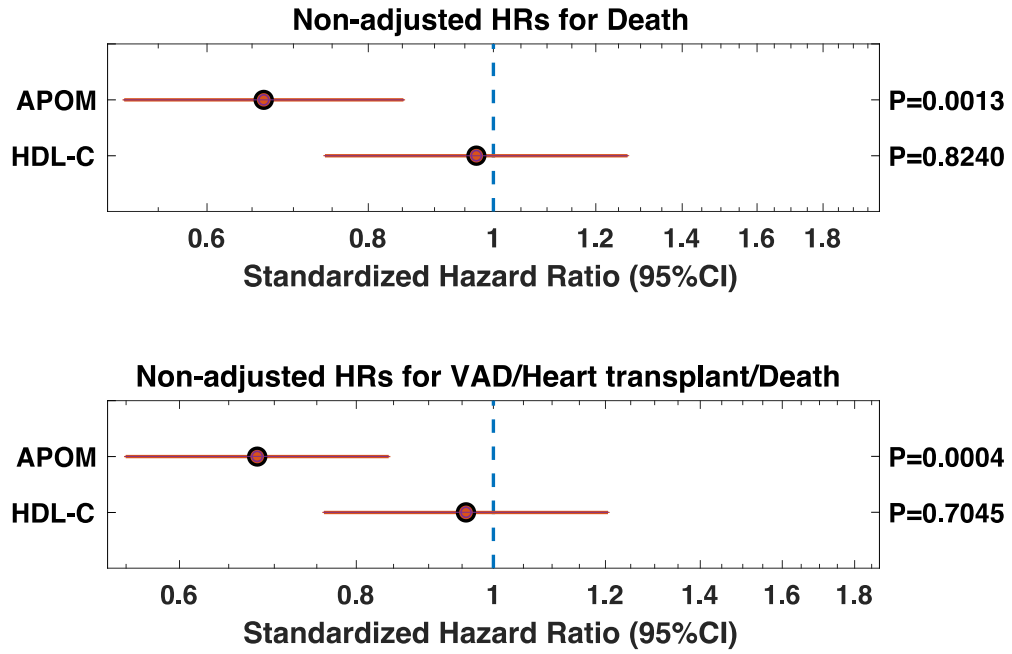

B.

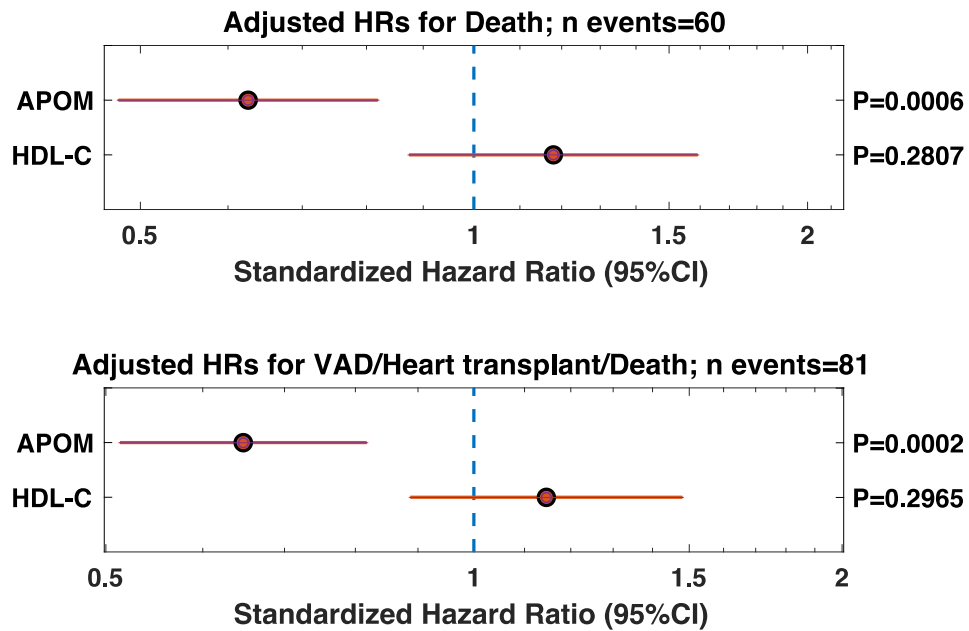

**Online Figure 2. Associations between APOM measured by ELISA vs. APOA-I (measured by immunonephelometry) and various endpoints in non-adjusted analyses (A) and analyses adjusted for each other (B).**

**A.**

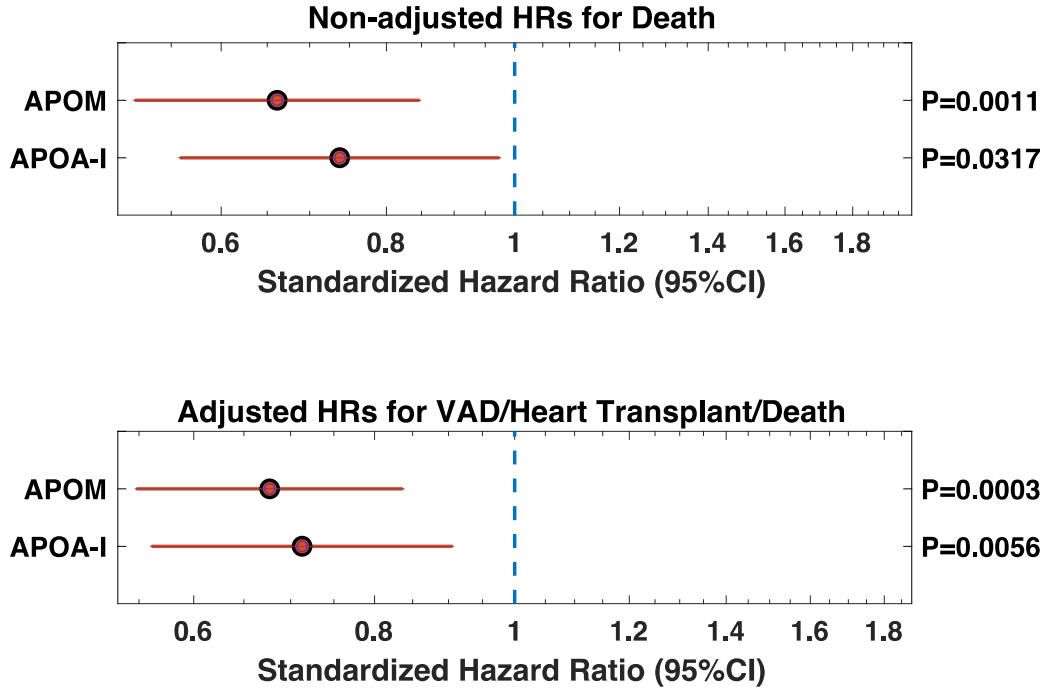

**B.**

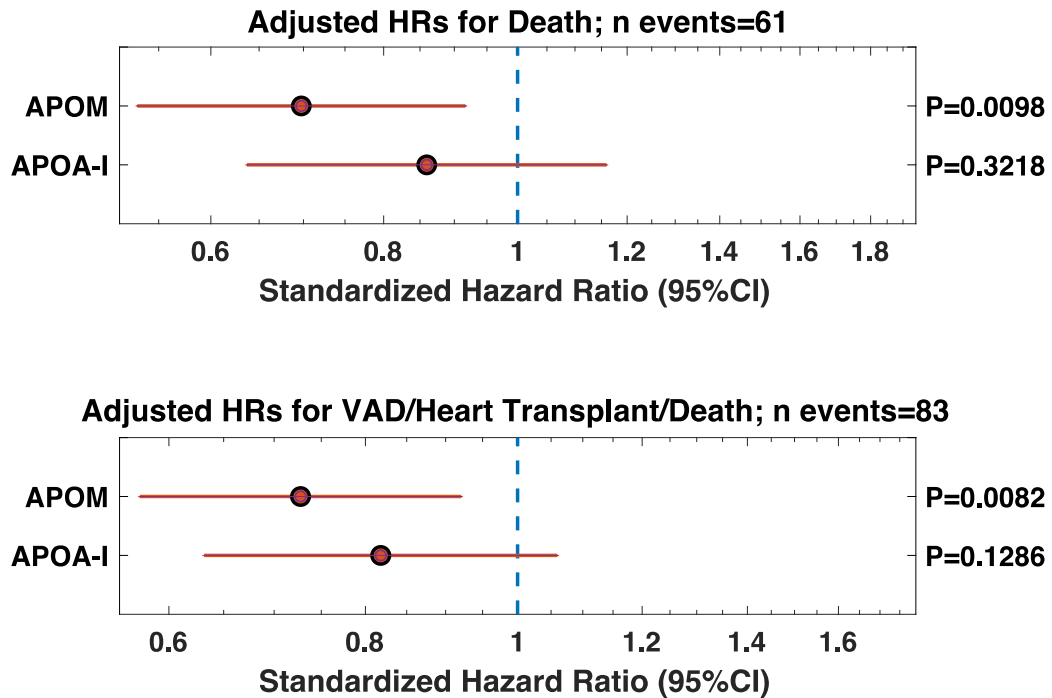

Online Figure 3.

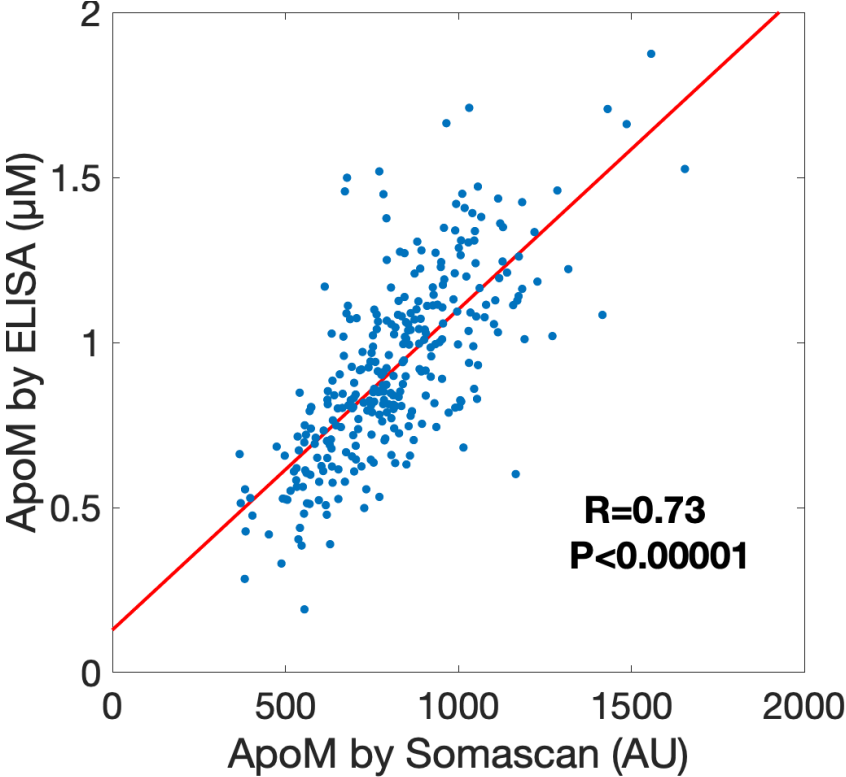

**Online Figure 4. Correlation of HDL-associated APOM and S1P (PHFS participants). HDL was isolated from PHFS patients with subsequent ELISA for APOM and S1P determination by liquid chromatography–mass spectrometry**

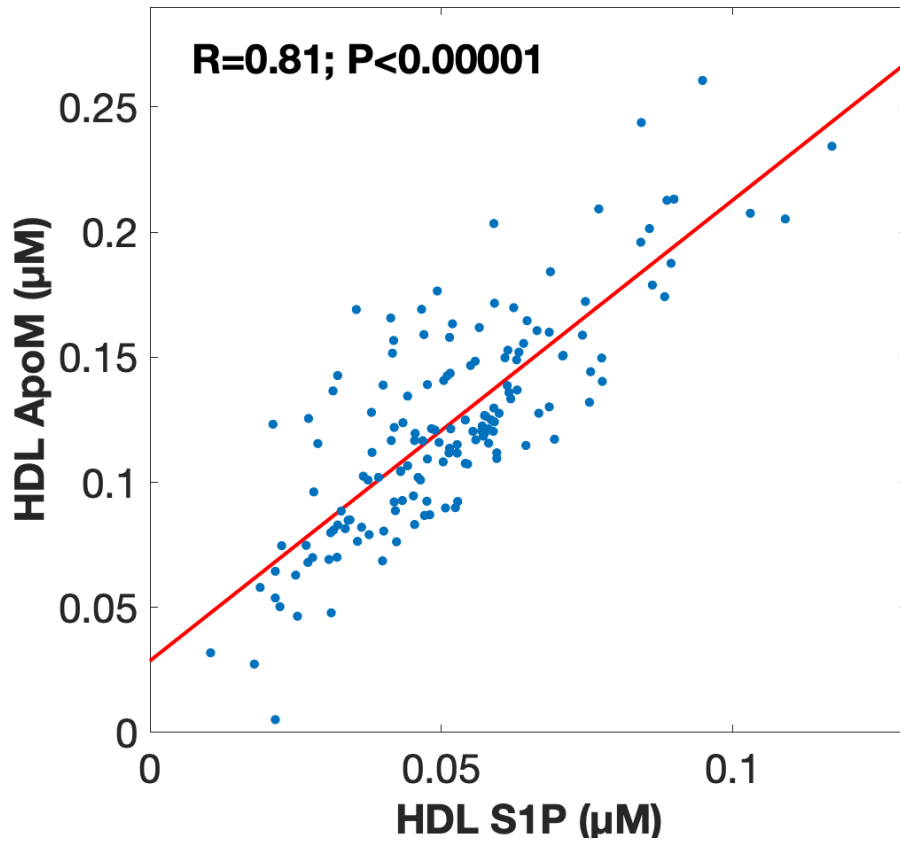

**Online Figure 5. Comparison of inflammatory biomarkers measured with independent methods (Luminex assay) and high-sensitivity CRP (Abbott standard clinical assay), across tertiles of APOM, with T1 being the lowest tertile and T3 being the highest.**

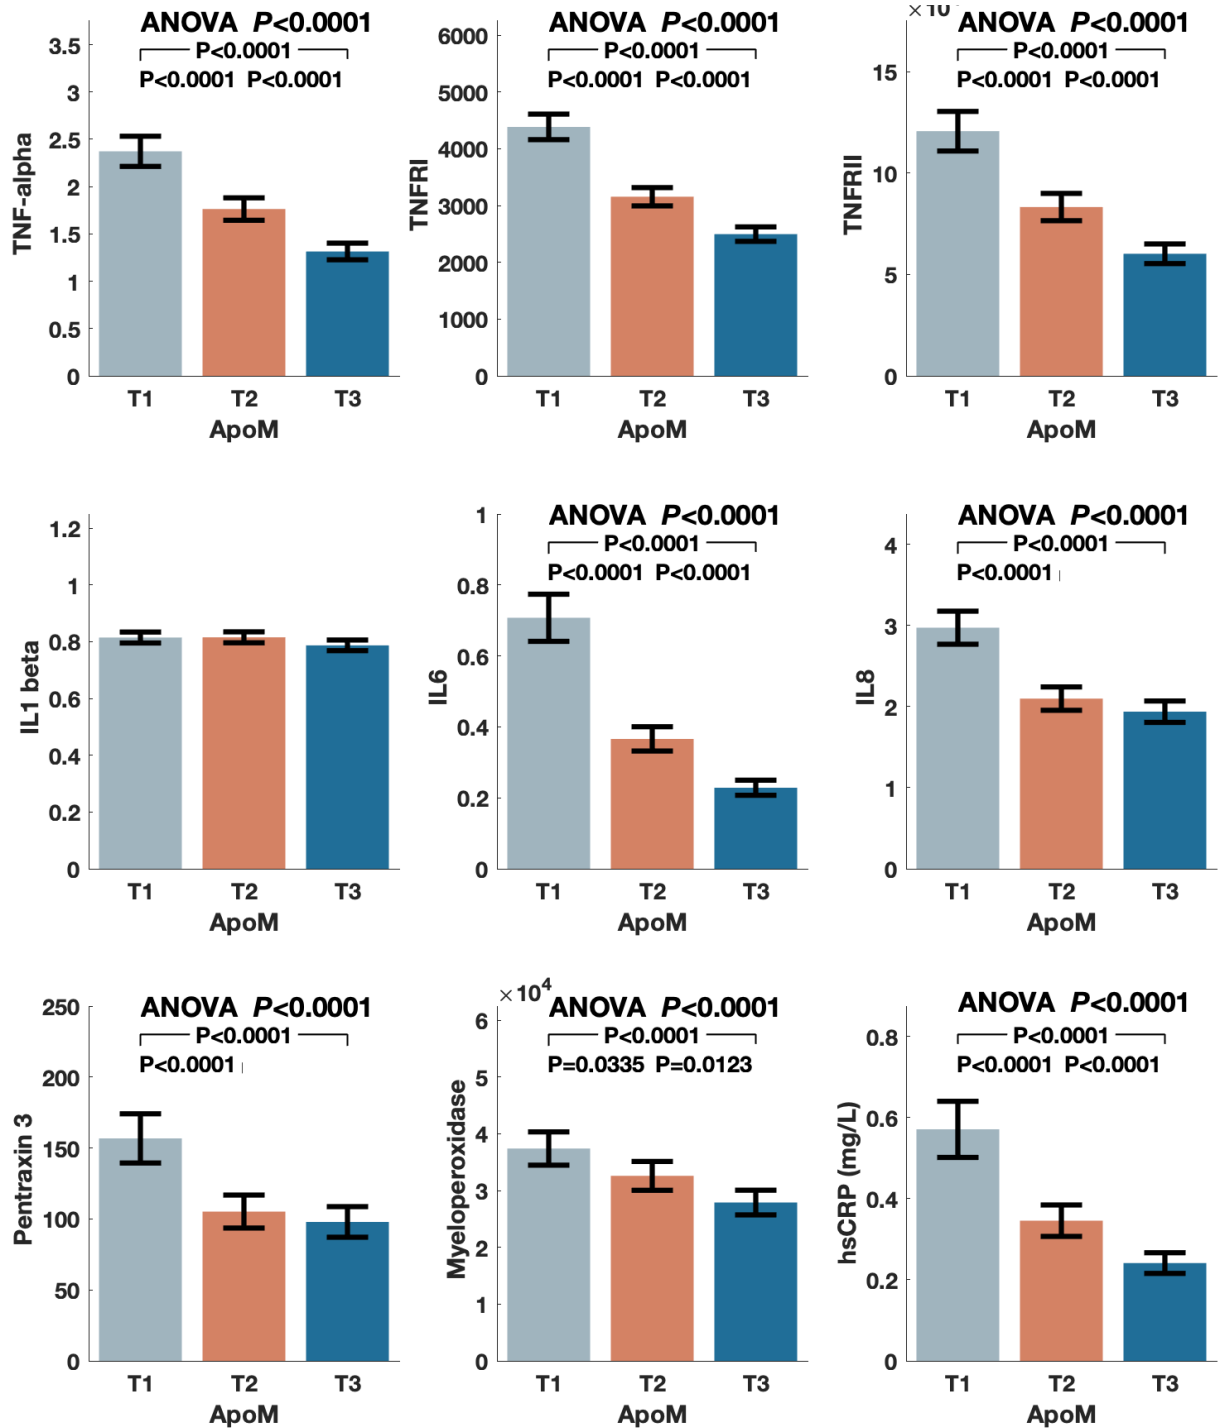

**Online Figure 6. Attenuation of the relationship between APOM and death (A) and death, ventricular assist device implantation or heart transplantation (B). For each endpoint, Standardized hazard ratios for APOM in an unadjusted model and in a model adjusted for TNF-alpha, TNF-RI, TNF-RII, IL-1beta, IL-6, IL-8, pentraxin3, myeloperoxidase and high-sensitivity C-reactive protein are shown.**

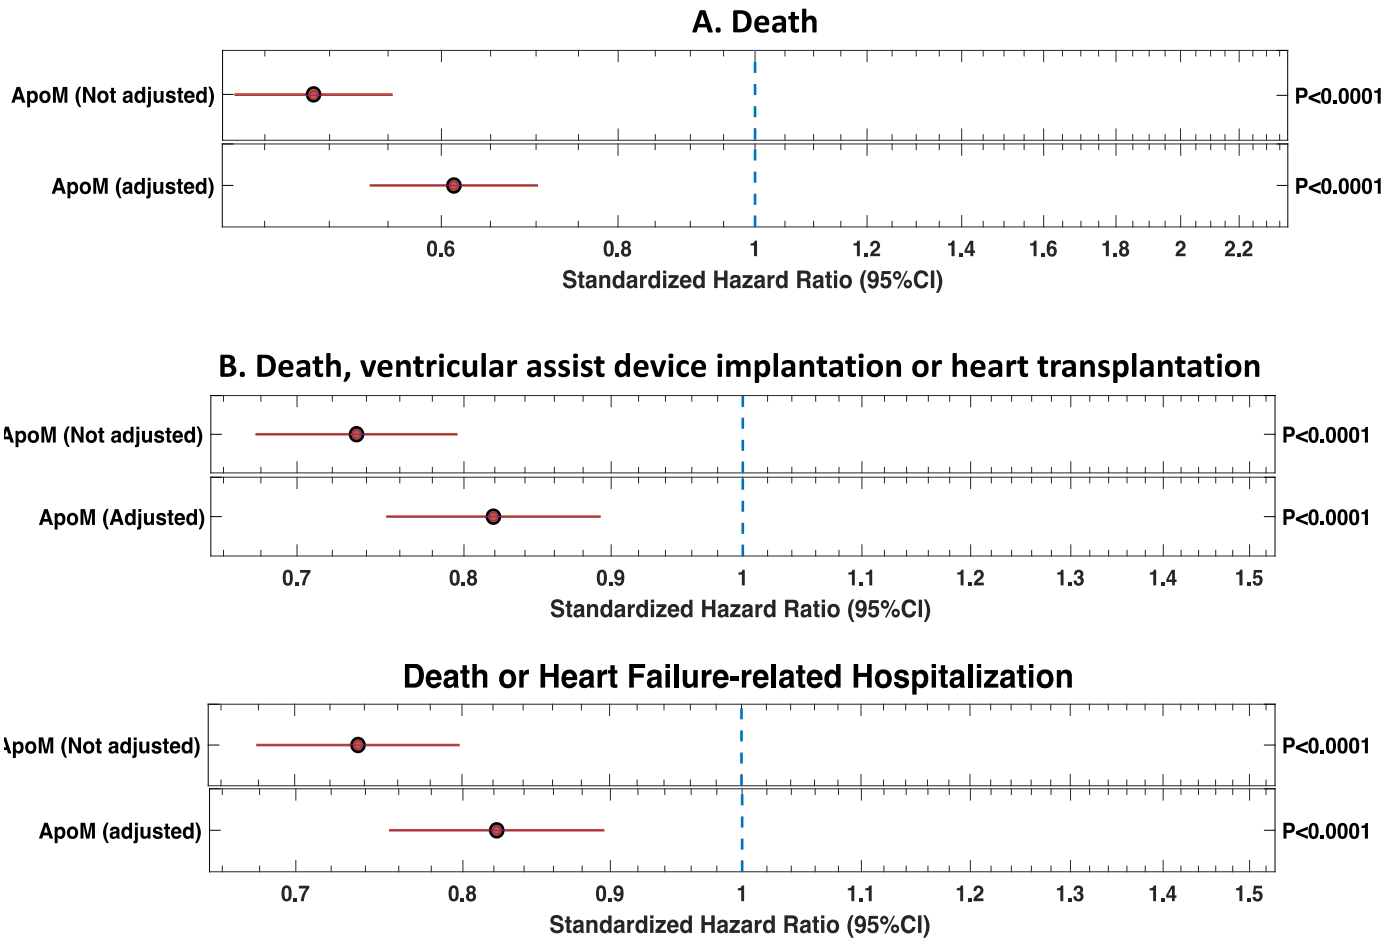

**Online Table 1. General Characteristics of Penn Heart Failure Study Participants (n=2170)**

| General Characteristic                | Mean±SD, median (IQR) or count (%) |
|---------------------------------------|------------------------------------|
| <b>Age (years)</b>                    | 57.8 (47.6,66.1)                   |
| <b>Male sex</b>                       | 1435 (66.13%)                      |
| <b>Race/Ethnicity</b>                 |                                    |
| <b>Caucasian</b>                      | 1580 (75.82%)                      |
| <b>African American</b>               | 460 (22.07%)                       |
| <b>Other</b>                          | 86 (4.4 %)                         |
| <b>BMI, (kg/m<sup>2</sup>)</b>        | 28.8 (25.1,33.9)                   |
| <b>Systolic BP (mmHg)</b>             | 112 (100,128)                      |
| <b>Diastolic BP (mmHg)</b>            | 70 (62,78)                         |
| <b>Ischemic etiology</b>              | 662 (30.72%)                       |
| <b>History of PCI</b>                 | 468 (21.57%)                       |
| <b>History of CABG</b>                | 392 (18.06%)                       |
| <b>Current smoking</b>                | 196 (9.03%)                        |
| <b>Diabetes</b>                       | 622 (28.66%)                       |
| <b>Atrial fibrillation or flutter</b> | 781 (35.99%)                       |
| <b>History of pacemaker</b>           | 137 (6.31%)                        |
| <b>History of ICD</b>                 | 456 (21.01%)                       |
| <b>History of Biventricular pacer</b> | 33 (1.52%)                         |
| <b>Serum creatinine</b>               | 1.1 (0.93,1.49)                    |
| <b>LV EF (%)</b>                      | 30 (20,45)                         |
| <b>EF Category</b>                    |                                    |
| <i>Reduced EF</i>                     | 1705 (82.45%)                      |
| <i>Recovered EF</i>                   | 203 (9.82%)                        |
| <i>Preserved EF</i>                   | 160 (7.74%)                        |
| <b>NYHA Class</b>                     |                                    |
| <b>NYHA 1</b>                         | 374 (17.36%)                       |
| <b>NYHA 2</b>                         | 968 (44.94%)                       |
| <b>NYHA 3</b>                         | 685 (31.80%)                       |
| <b>NYHA 4</b>                         | 127 (5.90%)                        |
| <b>BNP (pg/mL)</b>                    | 163 (47,551)                       |
| <b>Medication Use</b>                 |                                    |
| <b>Beta Blocker</b>                   | 1923 (88.62%)                      |
| <b>Aspirin</b>                        | 1234 (56.87%)                      |
| <b>ACEI/ARBs</b>                      | 1856 (85.53%)                      |
| <b>Hydralazine</b>                    | 183 (8.43%)                        |
| <b>Organic Nitrates</b>               | 343 (15.81%)                       |
| <b>Digoxin</b>                        | 774 (35.67%)                       |
| <b>Loop diuretic</b>                  | 1524 (70.23%)                      |
| <b>MRA</b>                            | 739 (34.06%)                       |
| <b>Statin</b>                         | 1127 (51.94%)                      |



|                                               |                 |
|-----------------------------------------------|-----------------|
| <b>CCBs</b>                                   | 200 (9.22%)     |
| <b>APOM (ELISA, <math>\mu</math>M), n=304</b> | 0.92 $\pm$ 0.28 |
| <b>APOM (AU), n=2170</b>                      | 804 (665,962)   |

APOM=apolipoprotein M; ARB=angiotensin receptor blocker; ACE: angiotensin converting enzyme; CCB: calcium channel blocker; BNP = b-type natriuretic peptide; ICD=Implanted Cardioverter Defibrillator; LV EF= left ventricular ejection fraction; BMI=body mass index; NYHA=New York Heart Association; MRA=mineralocorticoid receptor antagonist.

**Online Table 2. Association between APOM, measured by ELISA, and outcomes in PHFS.**

| <b>Model</b>                                          | <b>Standardized Hazard Ratio</b> | <b><i>P</i> value</b> |
|-------------------------------------------------------|----------------------------------|-----------------------|
| <b>APOM measured by ELISA (<i>n</i>=297)</b>          |                                  |                       |
| <b>All-cause death (<i>NE</i>=91)</b>                 |                                  |                       |
| <b>Non-adjusted</b>                                   | 0.63 (0.51-0.76)                 | <0.0001               |
| <b>Adjusted for MAGGIC risk score</b>                 | 0.71 (0.56-0.90)                 | 0.0044                |
| <b>Adjusted for MAGGIC risk score plus BNP</b>        | 0.73 (0.57-0.93)                 | 0.0107                |
| <b>Death / VAD / Heart Transplant (<i>NE</i>=126)</b> |                                  |                       |
| <b>Non-adjusted</b>                                   | 0.67 (0.57-0.79)                 | <0.0001               |
| <b>Adjusted for MAGGIC risk score</b>                 | 0.77 (0.63-0.94)                 | 0.0110                |
| <b>Adjusted for MAGGIC risk score plus BNP</b>        | 0.79 (0.65-0.97)                 | 0.0274                |

**Online Table 3. Formal interaction analysis between APOM levels at baseline and ischemic vs. non-ischemic etiology as predictors of outcomes. The numbers shown are the P value for the interaction terms.**

|                         | <b>Death, VAD or heart transplant</b> | <b>Death or HF-related hospitalization</b> | <b>Death</b> |
|-------------------------|---------------------------------------|--------------------------------------------|--------------|
| <b>APOM by SomaScan</b> | 0.1064                                | 0.1826                                     | 0.0820       |
| <b>APOM by ELISA</b>    | 0.5606                                | 0.5522                                     | 0.7292       |

**Online Table 4. Relationship between APOM and outcomes, in analyses stratified according to ischemic vs. non-ischemic etiology.**

| <b>Ischemic (n=688)</b>                    | <b>HR</b> | <b>95%CI, LB</b> | <b>95%CI, UB</b> | <b>P value</b> |
|--------------------------------------------|-----------|------------------|------------------|----------------|
| <b>Death, VAD or heart transplant</b>      | 0.82      | 0.73             | 0.92             | 0.0006         |
| <b>Death or HF-related hospitalization</b> | 0.81      | 0.72             | 0.91             | 0.0003         |
| <b>Death</b>                               | 0.63      | 0.53             | 0.74             | <0.0001        |
| <b>Non-ischemic (n=1542)</b>               |           |                  |                  |                |
| <b>Death, VAD or heart transplant</b>      | 0.71      | 0.65             | 0.78             | <0.0001        |
| <b>Death or HF-related hospitalization</b> | 0.72      | 0.66             | 0.79             | <0.0001        |
| <b>Death</b>                               | 0.49      | 0.42             | 0.57             | <0.0001        |

**Online Table 5. General Characteristics of the Validation Cohort Study Participants in the Washington University Heart Failure Registry**

| General Characteristic                | Mean±SD, median (IQR)<br>or count (%) |
|---------------------------------------|---------------------------------------|
| <b>Age (years)</b>                    | 53.1 (51 to 55.2)                     |
| <b>Male sex</b>                       | 100 (57.8)                            |
| <b>Race/Ethnicity</b>                 |                                       |
| <b>Caucasian</b>                      | 127 (73.4)                            |
| <b>African American</b>               | 46 (26.6)                             |
| <b>Other</b>                          | ---                                   |
| <b>BMI, (kg/m<sup>2</sup>)</b>        | 31 (29.8 to 32.2)                     |
| <b>Systolic BP (mmHg)</b>             | 117 (114 to 119)                      |
| <b>Diastolic BP (mmHg)</b>            | 71.6 (69.9 to 73.3)                   |
| <b>Ischemic etiology</b>              | 41 (23.7)                             |
| <b>History of PCI</b>                 | 32 (18.50%)                           |
| <b>History of CABG</b>                | 19 (10.98%)                           |
| <b>Current smoking</b>                | 19 (10.98%)                           |
| <b>Diabetes</b>                       | 39 (22.54%)                           |
| <b>Atrial fibrillation or flutter</b> | 56 (32.37%)                           |
| <b>History of pacemaker</b>           | 13 (7.51%)                            |
| <b>History of ICD</b>                 | 56 (32.37%)                           |
| <b>History of Biventricular pacer</b> | 29 (16.76%)                           |
| <b>Serum creatinine</b>               | 1.15 (1.08 to 1.22)                   |
| <b>LV EF (%)</b>                      | 39.9 (37.5 to 42.3)                   |
| <b>EF Category</b>                    |                                       |
| <b>Reduced EF</b>                     | 111 (64.16%)                          |
| <b>Preserved EF</b>                   | 62 (35.84%)                           |
| <b>NYHA Class</b>                     |                                       |
| <b>NYHA 1</b>                         | 24 (13.9)                             |
| <b>NYHA 2</b>                         | 96 (55.5)                             |
| <b>NYHA 3</b>                         | 40 (23.1)                             |
| <b>NYHA 4</b>                         | 13 (7.5)                              |
| <b>Medication Use</b>                 |                                       |
| <b>Beta Blocker</b>                   | 149 (86.13%)                          |
| <b>Aspirin</b>                        | 112 (64.74%)                          |
| <b>ACEI</b>                           | 115 (66.47%)                          |
| <b>ARBs</b>                           | 33 (19.08%)                           |
| <b>Hydralazine</b>                    | 31 (17.92%)                           |
| <b>Organic Nitrates</b>               | 48 (27.75%)                           |

|                      |              |
|----------------------|--------------|
| <b>Digoxin</b>       | 54 (31.21%)  |
| <b>Loop diuretic</b> | 137 (79.19%) |
| <b>MRA</b>           | 69 (39.88%)  |
| <b>Statin</b>        | 95 (54.91%)  |
| <b>CCBs</b>          | 25 (14.45%)  |

Values represent the mean  $\pm$  standard deviation, median (interquartile range) or count (percentage) as appropriate.

ARB=angiotensin receptor blocker; ACE: angiotensin converting enzyme; CCB: calcium channel blocker; BNP = b-type natriuretic peptide; ICD=Implanted Cardioverter Defibrillator; LV EF= left ventricular ejection fraction; BMI=body mass index; NYHA=New York Heart Association; MRA=mineralocorticoid receptor antagonist.

**Online Table 6. Hazard Ratios for death and death/heart failure admission per standard deviation increase in APOM in the 2 validation cohorts**

|                                                     | <b>Washington University HF Registry (n=173)</b> |                |                                                               |                |
|-----------------------------------------------------|--------------------------------------------------|----------------|---------------------------------------------------------------|----------------|
|                                                     | <b>All-Cause Death<br/>(NE = 21)</b>             |                | <b>Death / LVAD / Heart<br/>Transplantation<br/>(NE = 29)</b> |                |
| <b>Model</b>                                        | <b>Standardized HR<br/>(95%CI)</b>               | <b>P value</b> | <b>Standardized HR<br/>(95%CI)</b>                            | <b>P value</b> |
| <b>Non-adjusted</b>                                 | 0.57 (0.41-0.80)                                 | 0.0011         | 0.60 (0.41-0.87)                                              | 0.0077         |
| <b>Adjusted for MAGGIC<br/>RS</b>                   | 0.59 (0.41-0.86)                                 | 0.0066         | 0.63 (0.43-0.94)                                              | 0.024          |
| <b>Adjusted for MAGGIC<br/>RS<br/>and NT-ProBNP</b> | 0.58 (0.40-0.84)                                 | 0.0042         | 0.64 (0.43-0.93)                                              | 0.0213         |
|                                                     | <b>TOPCAT (n=218)</b>                            |                |                                                               |                |
|                                                     | <b>All-Cause Death<br/>(NE = 48)</b>             |                | <b>Death / HF Admission<br/>(NE = 77)</b>                     |                |
| <b>Model</b>                                        | <b>Standardized HR<br/>(95%CI)</b>               | <b>P value</b> | <b>Standardized HR<br/>(95%CI)</b>                            | <b>P value</b> |
| <b>Non-adjusted</b>                                 | 0.76 (0.58-0.99)                                 | 0.0419         | 0.65 (0.51-0.82)                                              | 0.0002         |
| <b>Adjusted for MAGGIC<br/>RS</b>                   | 0.75 (0.58-0.98)                                 | 0.0368         | 0.64 (0.51-0.81)                                              | 0.0002         |
| <b>Adjusted for MAGGIC<br/>RS<br/>and NT-ProBNP</b> | 0.74 (0.57-0.97)                                 | 0.0312         | 0.63 (0.50-0.80)                                              | 0.0001         |

*n*=total number of participants included in the analysis.

*NE*=number of events

## Online Table 7. General Characteristics of Participants in the TOPCAT trial

Included in this study (*n*=218).

| General Characteristic                  | Mean±SD, median (IQR) or count (%) |
|-----------------------------------------|------------------------------------|
| <b>Age (years)</b>                      | 71.2 (69.9 to 72.5)                |
| <b>Male sex</b>                         | 122 (55.96%)                       |
| <b>Race/Ethnicity</b>                   |                                    |
| <b>Caucasian</b>                        | 188 (86.24%)                       |
| <b>African American</b>                 | 26 (11.93%)                        |
| <b>Asian</b>                            | 1 (0.46%)                          |
| <b>Other</b>                            | 3 (1.38%)                          |
| <b>BMI, (kg/m<sup>2</sup>)</b>          | 33.1 (32.1 to 34.2)                |
| <b>Systolic BP (mmHg)</b>               | 124 (121 to 126)                   |
| <b>Diastolic BP (mmHg)</b>              | 68.5 (67 to 70)                    |
| <b>History of PCI</b>                   | 56 (25.69%)                        |
| <b>History of CABG</b>                  | 58 (26.61%)                        |
| <b>History of smoking</b>               | 127 (61.95%)                       |
| <b>Diabetes</b>                         | 103 (47.25%)                       |
| <b>Atrial fibrillation</b>              | 108 (49.54%)                       |
| <b>History of pacemaker</b>             | 27 (12.39%)                        |
| <b>eGFR (ml/min/1.73 m<sup>2</sup>)</b> | 61.7 (59 to 64.4)                  |
| <b>NYHA Class</b>                       |                                    |
| <b>NYHA 1-2</b>                         | 135 (61.9%)                        |
| <b>NYHA 3-4</b>                         | 83 (38.07%)                        |
| <b>Medication Use</b>                   |                                    |
| <b>Beta Blocker</b>                     | 181 (83.03%)                       |
| <b>Aspirin</b>                          | 135 (61.93%)                       |
| <b>ACEI</b>                             | 101 (46.33%)                       |
| <b>ARBs</b>                             | 68 (31.19%)                        |
| <b>Organic Nitrates</b>                 | 46 (21.10%)                        |
| <b>Diuretic</b>                         | 198 (90.83%)                       |
| <b>Statin</b>                           | 161 (73.85%)                       |
| <b>CCBs</b>                             | 85 (38.99%)                        |

Values represent the mean ± standard deviation, median (interquartile range) or count (percentage) as appropriate. ARB=angiotensin receptor blocker; ACE: angiotensin converting enzyme; CCB: calcium channel blocker; BMI=body mass index; NYHA=New York Heart Association; eGFR=estimated glomerular filtration rate.



**Online Table 8. Top canonical pathways associated with APOM**

| <i>Canonical Pathway</i>                         | <i>-log(p-value)</i> | <i>Ratio</i> | <i>z-score</i> |
|--------------------------------------------------|----------------------|--------------|----------------|
| <b>Acute Phase Response Signaling</b>            | 8.72                 | 0.712        | -2.25          |
| <b>Coagulation System</b>                        | 6.33                 | 0.9          | -0.192         |
| <b>LXR/RXR Activation</b>                        | 5.48                 | 0.701        | 1.457          |
| <b>Huntington's Disease Signaling</b>            | 4.29                 | 0.653        | -1.265         |
| <b>FXR/RXR Activation</b>                        | 4.29                 | 0.684        |                |
| <b>Leptin Signaling in Obesity</b>               | 3.88                 | 0.8          | -1.698         |
| <b>Complement System</b>                         | 3.64                 | 0.793        | 0.728          |
| <b>EGF Signaling</b>                             | 3.24                 | 0.743        | -1.177         |
| <b>Role of Tissue Factor in Cancer</b>           | 2.94                 | 0.636        |                |
| <b>Clathrin-mediated Endocytosis Signaling</b>   | 2.77                 | 0.602        |                |
| <b>Axonal Guidance Signaling</b>                 | 2.67                 | 0.551        |                |
| <b>Gα12/13 Signaling</b>                         | 2.66                 | 0.645        | -1.897         |
| <b>IGF-1 Signaling</b>                           | 2.66                 | 0.645        | -2.043         |
| <b>Leukocyte Extravasation Signaling</b>         | 2.62                 | 0.609        | -2.449         |
| <b>Extrinsic Prothrombin Activation Pathway</b>  | 2.59                 | 0.857        | 0              |
| <b>tRNA Charging</b>                             | 2.59                 | 0.857        | -2.309         |
| <b>Intrinsic Prothrombin Activation Pathway</b>  | 2.46                 | 0.694        | -0.209         |
| <b>14-3-3-mediated Signaling</b>                 | 2.4                  | 0.643        | -1.715         |
| <b>UVB-Induced MAPK Signaling</b>                | 2.4                  | 0.71         | -1.706         |
| <b>Renin-Angiotensin Signaling</b>               | 2.34                 | 0.633        | -2.333         |
| <b>Dendritic Cell Maturation</b>                 | 2.33                 | 0.596        | -2.496         |
| <b>RhoGDI Signaling</b>                          | 2.32                 | 0.629        | 1.48           |
| <b>eNOS Signaling</b>                            | 2.31                 | 0.647        | -0.557         |
| <b>Renal Cell Carcinoma Signaling</b>            | 2.25                 | 0.659        | -1.279         |
| <b>Colorectal Cancer Metastasis Signaling</b>    | 2.23                 | 0.579        | -2.433         |
| <b>VEGF Signaling</b>                            | 2.22                 | 0.632        | -1.061         |
| <b>IL-3 Signaling</b>                            | 2.22                 | 0.652        | -2.191         |
| <b>Aldosterone Signaling in Epithelial Cells</b> | 2.19                 | 0.627        | -1.807         |
| <b>Insulin Receptor Signaling</b>                | 2.19                 | 0.627        | -2.535         |
| <b>Growth Hormone Signaling</b>                  | 2.17                 | 0.667        | -1.043         |

**Supplemental Excel File**

Title: Proteome-wide regression against APOM
